# Supplementary material for: Impact of volcanic sulfate aerosols on the stratospheric heating: implications on the Quasi-Biennial Oscillation
Source: Copernicus journal article supplement (doi:10.5194/egusphere-2024-3825), 2025-02-05
Supplement: Supplementary file [file egusphere-2024-3825-AC1-supplement.pdf]

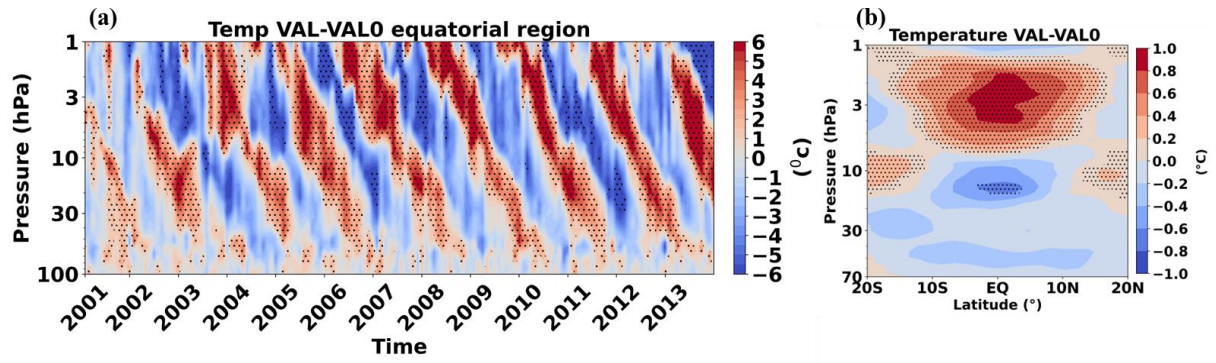

Fig.: (a) Time series of temperature zonally averaged over the 5S-5N for the period 2001-2013. (b) Latitude-pressure cross section of zonally averaged temperature for period 2001-2013 from VAL-VAL0 simulation. The black dots indicate the regions where the differences are significant for the difference of the mean (p-value < 0.05) using a two-sided t-test.
